# Supplementary material
Source: bioRxiv or medRxiv preprint supplement (https://medrxiv.org/content/medrxiv/early/2021/09/27/2021.09.24.21263966/DC1/embed/media-1.pdf)
Supplement: Supplementary file [file media-1.pdf]

# Effectiveness of rectal artesunate as pre-referral treatment for severe malaria in children <5 years of age

Manuel W. Hetzel<sup>1,2,\*</sup>, Jean Okitawutshu<sup>1,3</sup>, Antoinette Tshetu<sup>3</sup>, Elizabeth Omoluabi<sup>4</sup>, Phyllis Awor<sup>5</sup>, Aita Signorell<sup>1,2</sup>, Nina C. Brunner<sup>1,2</sup>, Jean-Claude Kalenga<sup>3</sup>, Babatunde Akano<sup>4</sup>, Kazeem Ayodeji<sup>4</sup>, Charles Okon<sup>4</sup>, Ocheche Yusuf<sup>4</sup>, Proscovia Athieno<sup>5</sup>, Joseph Kimera<sup>5</sup>, Gloria Tumukunde<sup>5</sup>, Irene Angiro<sup>5</sup>, Giulia Delvento<sup>1,2</sup>, Tristan Lee<sup>1,2</sup>, Mark Lambiris<sup>1,2</sup>, Marek Kwiatkowski<sup>1,2</sup>, Nadja Cereghetti<sup>1,2</sup>, Theodoor Visser<sup>6</sup>, Harriet G. Napier<sup>6</sup>, Justin M. Cohen<sup>6</sup>, Valentina Buj<sup>1,7</sup>, Christian Burri<sup>1,2,#</sup>, Christian Lengeler<sup>1,2,#</sup>

<sup>1</sup>) Swiss Tropical and Public Health Institute, Basel, Switzerland

<sup>2</sup>) University of Basel, Basel, Switzerland

<sup>3</sup>) Kinshasa School of Public Health, Kinshasa, Democratic Republic of the Congo

<sup>4</sup>) Akena Associates, Abuja, Nigeria

<sup>5</sup>) Makerere University School of Public Health, Kampala, Uganda

<sup>6</sup>) Clinton Health Access Initiative, Boston, MA, USA

<sup>7</sup>) UNICEF, New York, NY, USA

\*Corresponding author: manuel.hetzel@swisstph.ch

#Equal contribution

## Supplementary material

## Supplementary Table S1: Study setting

|                                                             | DRC                                                                                                                                                                                     | Nigeria                                                                                                                                                                                                                                                    | Uganda                                                                                                                                                                        |
|-------------------------------------------------------------|-----------------------------------------------------------------------------------------------------------------------------------------------------------------------------------------|------------------------------------------------------------------------------------------------------------------------------------------------------------------------------------------------------------------------------------------------------------|-------------------------------------------------------------------------------------------------------------------------------------------------------------------------------|
| <b>Population (children &lt;5 years)</b>                    |                                                                                                                                                                                         |                                                                                                                                                                                                                                                            |                                                                                                                                                                               |
|                                                             | Health Zone                                                                                                                                                                             | Local Government Area                                                                                                                                                                                                                                      | District                                                                                                                                                                      |
|                                                             | Ipamu: 284'484 (52'523)                                                                                                                                                                 | Fufore: 280'660 (49'982)                                                                                                                                                                                                                                   | Kole: 298'394 (59'184)                                                                                                                                                        |
|                                                             | Kenge: 382'232 (70'567)                                                                                                                                                                 | Mayo-Belwa: 204'746 (33'101)                                                                                                                                                                                                                               | Kwania: 232'402 (48'582)                                                                                                                                                      |
|                                                             | Kingandu: 119'251 (22'016)                                                                                                                                                              | Song: 261'543 (47'347)                                                                                                                                                                                                                                     | Oyam: 465'190 (92'752)                                                                                                                                                        |
|                                                             | Total: 785'968 (145'107)                                                                                                                                                                | Total: 746'949 (130'430)                                                                                                                                                                                                                                   | Total: 995'986 (200'518)                                                                                                                                                      |
| Source                                                      | <a href="https://www.worldpop.org">https://www.worldpop.org</a>                                                                                                                         |                                                                                                                                                                                                                                                            |                                                                                                                                                                               |
| <b>Public health care providers*</b>                        |                                                                                                                                                                                         |                                                                                                                                                                                                                                                            |                                                                                                                                                                               |
| Community Health Workers                                    | Site de Soins Communautaire (Community Care Site) (N = 42)                                                                                                                              | Community-Oriented Resource Person (CORP) (N = 500)                                                                                                                                                                                                        | Village Health Team (VHT) members (N = 5,100)                                                                                                                                 |
| Primary Health Care                                         | Poste de Santé (Health Post) Centre de Santé (Health Centre) (N = 152)                                                                                                                  | Health Post** Primary Health Centre (PHC) (N = 77)                                                                                                                                                                                                         | Health Centre II (HC II) (N = 30)                                                                                                                                             |
| Referral Facilities                                         | Centre de Santé de Référence (Referral Health Centre) and Hôpital Général de Référence (General Referral Hospital) (N = 19)                                                             | Cottage Hospital (N = 3)                                                                                                                                                                                                                                   | Health Centre III (HC III), Health Centre IV (HC IV) and Hospital (N = 20)                                                                                                    |
| <b>General danger signs as per national iCCM guidelines</b> |                                                                                                                                                                                         |                                                                                                                                                                                                                                                            |                                                                                                                                                                               |
|                                                             | <ul style="list-style-type: none"> <li>- Unusually sleepy or unconscious</li> <li>- Not able to drink or feed anything</li> <li>- Vomiting everything</li> <li>- Convulsions</li> </ul> | <ul style="list-style-type: none"> <li>- Unusually sleepy or unconscious</li> <li>- Not able to drink or feed anything</li> <li>- Vomiting everything</li> <li>- Convulsions</li> <li>- Not responding to ACT</li> <li>- Yellowness of the eyes</li> </ul> | <ul style="list-style-type: none"> <li>- Very sleepy or unconscious</li> <li>- Not able to breastfeed or drink</li> <li>- Vomits everything</li> <li>- Convulsions</li> </ul> |

\*Number of providers at the beginning of the study period. \*\*Health posts were upgraded to Primary Health Centres during the study period.

# Supplementary Figure S1: Inclusion flow-charts

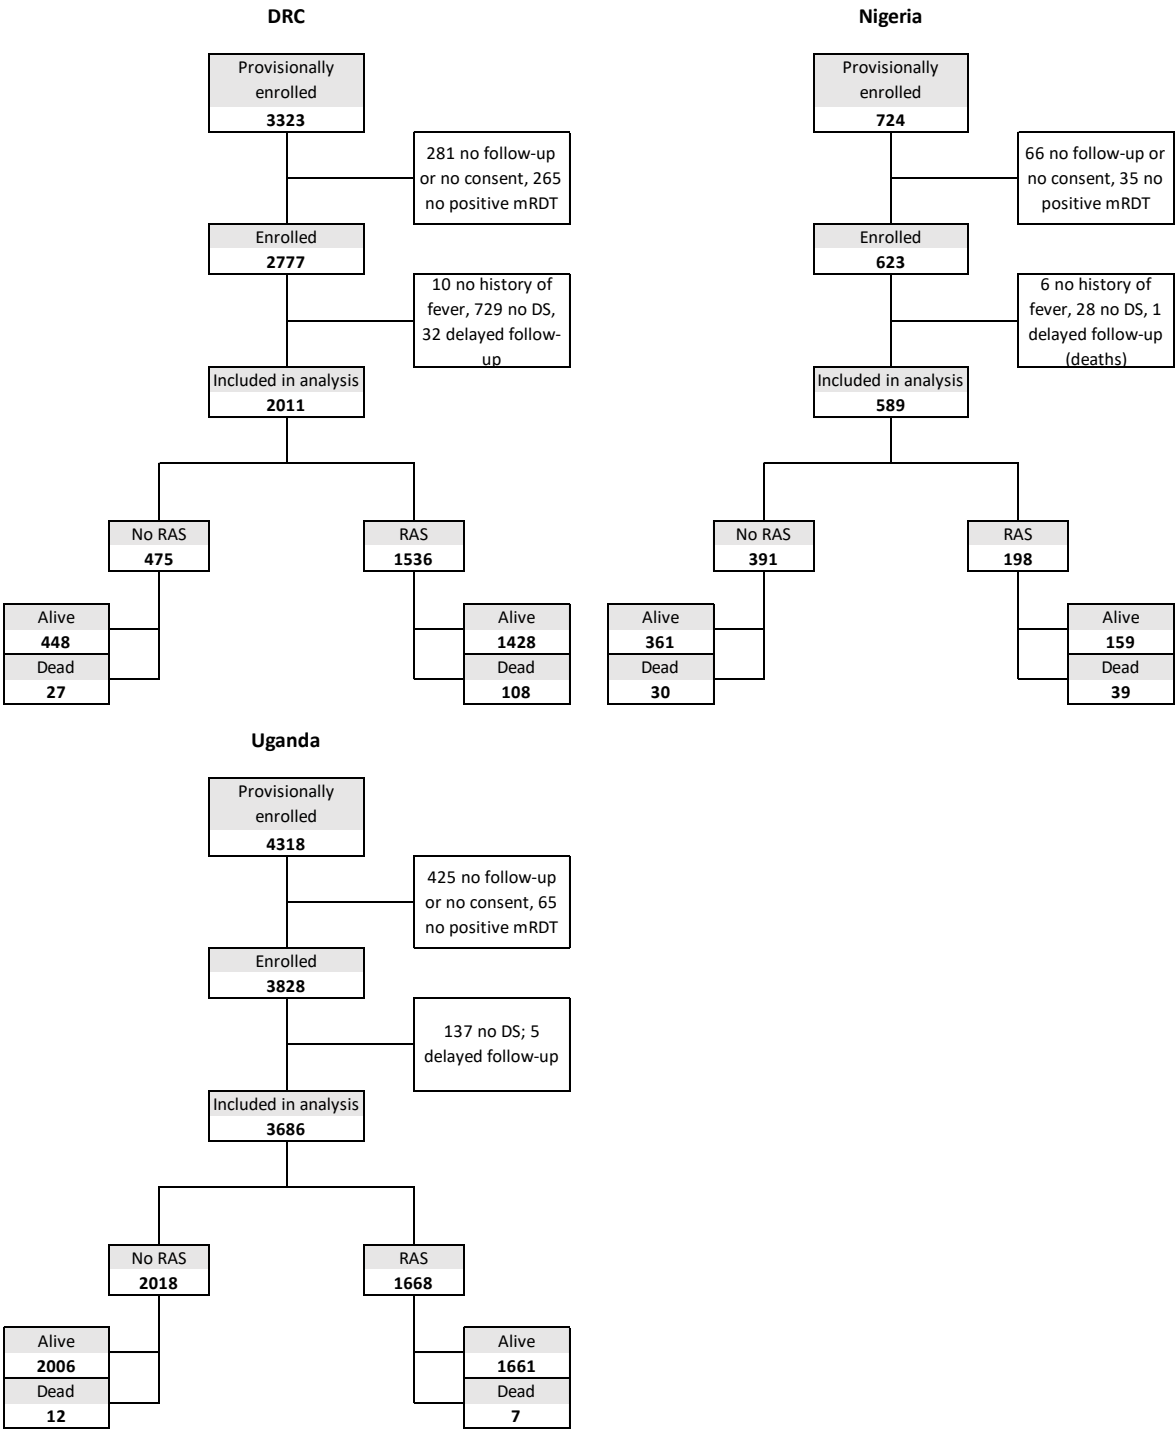

Supplementary Figure S2: **Complementary day 28 health outcome indicators, by country**

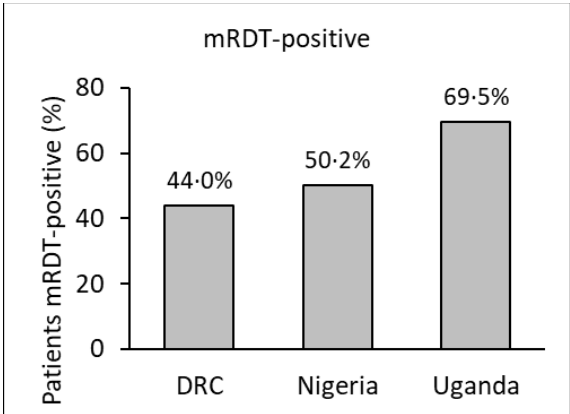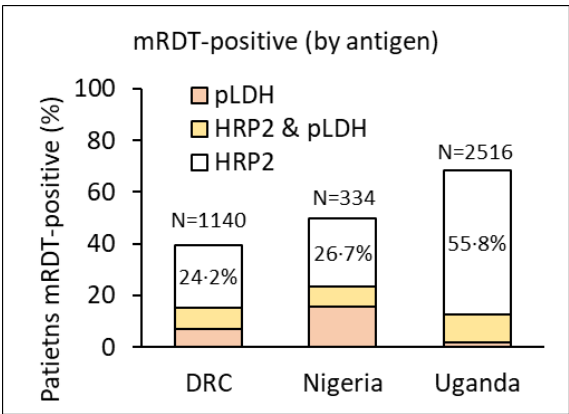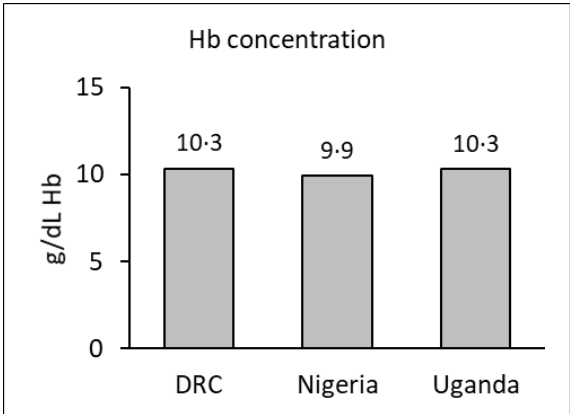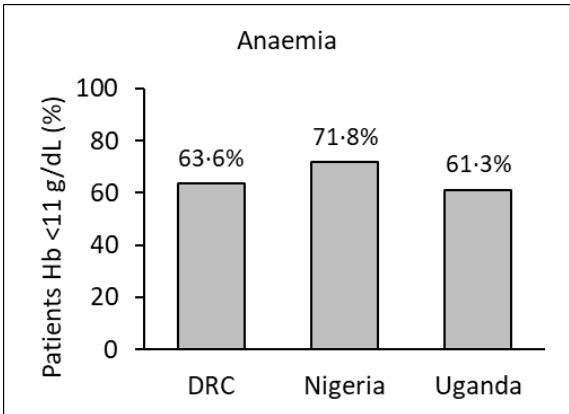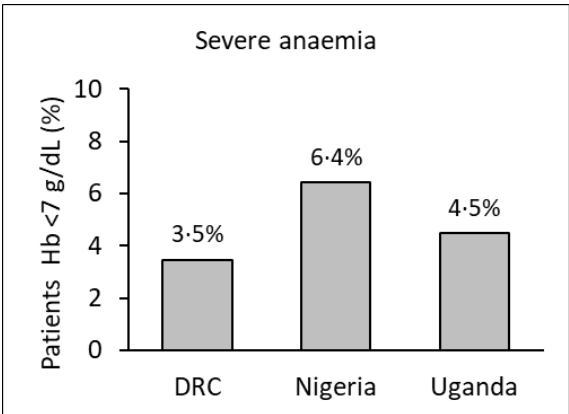

**Supplementary Figure S3: Results of HRP2/pLDH Combo tests at day 28 follow-up, by detected antigen (HRP2 and/or pLDH), in a sub-sample of study patients**

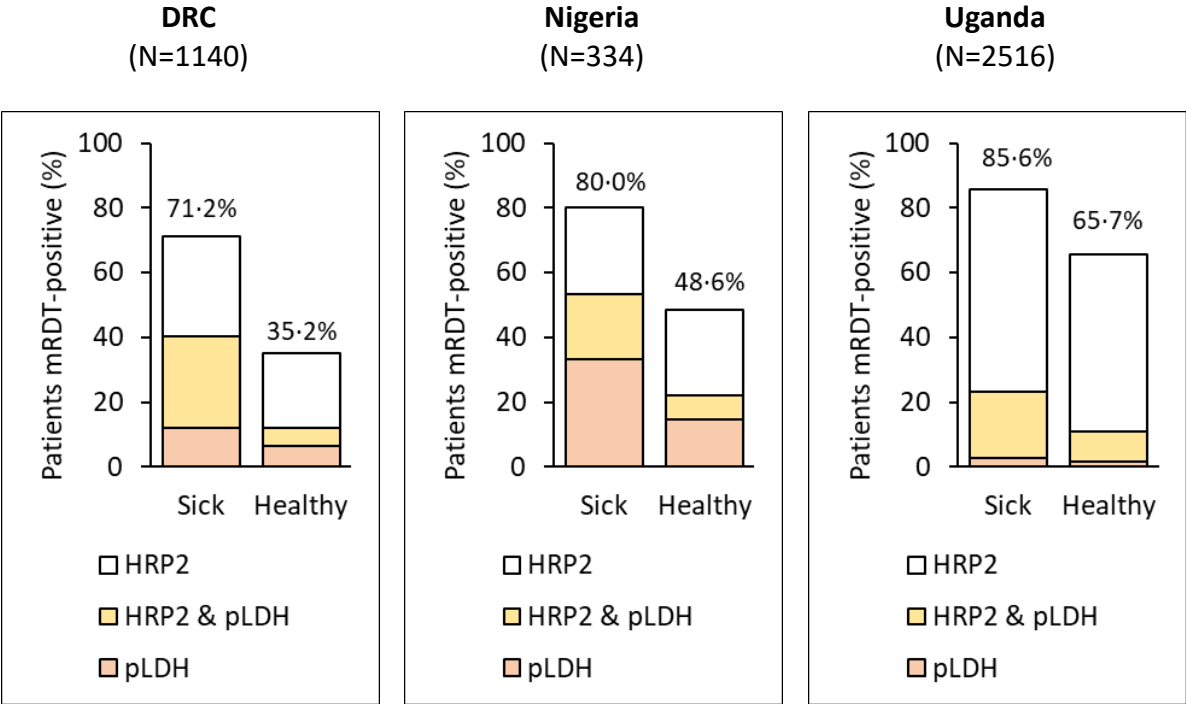

**Proportion HRP2 only out of all with positive mRDT**

DRC: healthy 66.2% vs. sick 43.4%, p < 0.001  
 Nigeria: healthy 54.8% vs. sick 33.3%, p = 0.15  
 Uganda: healthy 83.4% vs. sick 73.0%, p < 0.001

**Supplementary Figure S4: Mean haemoglobin (Hb) concentration and percent of children with anaemia (Hb <11 g/dL) among children sick or healthy at follow-up**

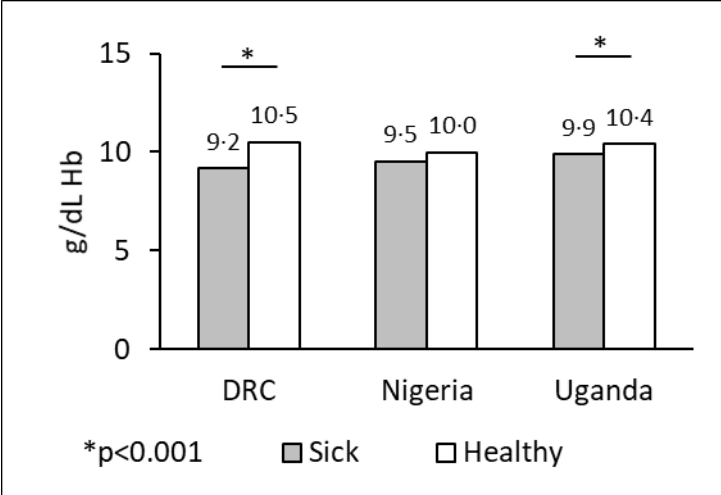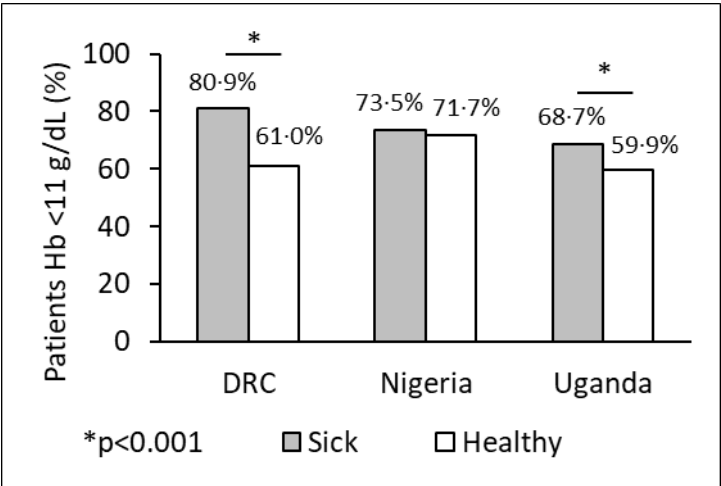

Reference for definitions of anaemia and severe anaemia: WHO. Haemoglobin concentrations for the diagnosis of anaemia and assessment of severity. Vitamin and Mineral Nutrition Information System. Geneva, World Health Organization, 2011 (WHO/NMH/NHD/MNM/11.1).

Supplementary Figure S5: (A) Time trend in monthly inclusions and case fatality ratio (CFR) expressed as 3-month moving average, by type of enrolling provider, and (B) overall CFR by enrolling provider

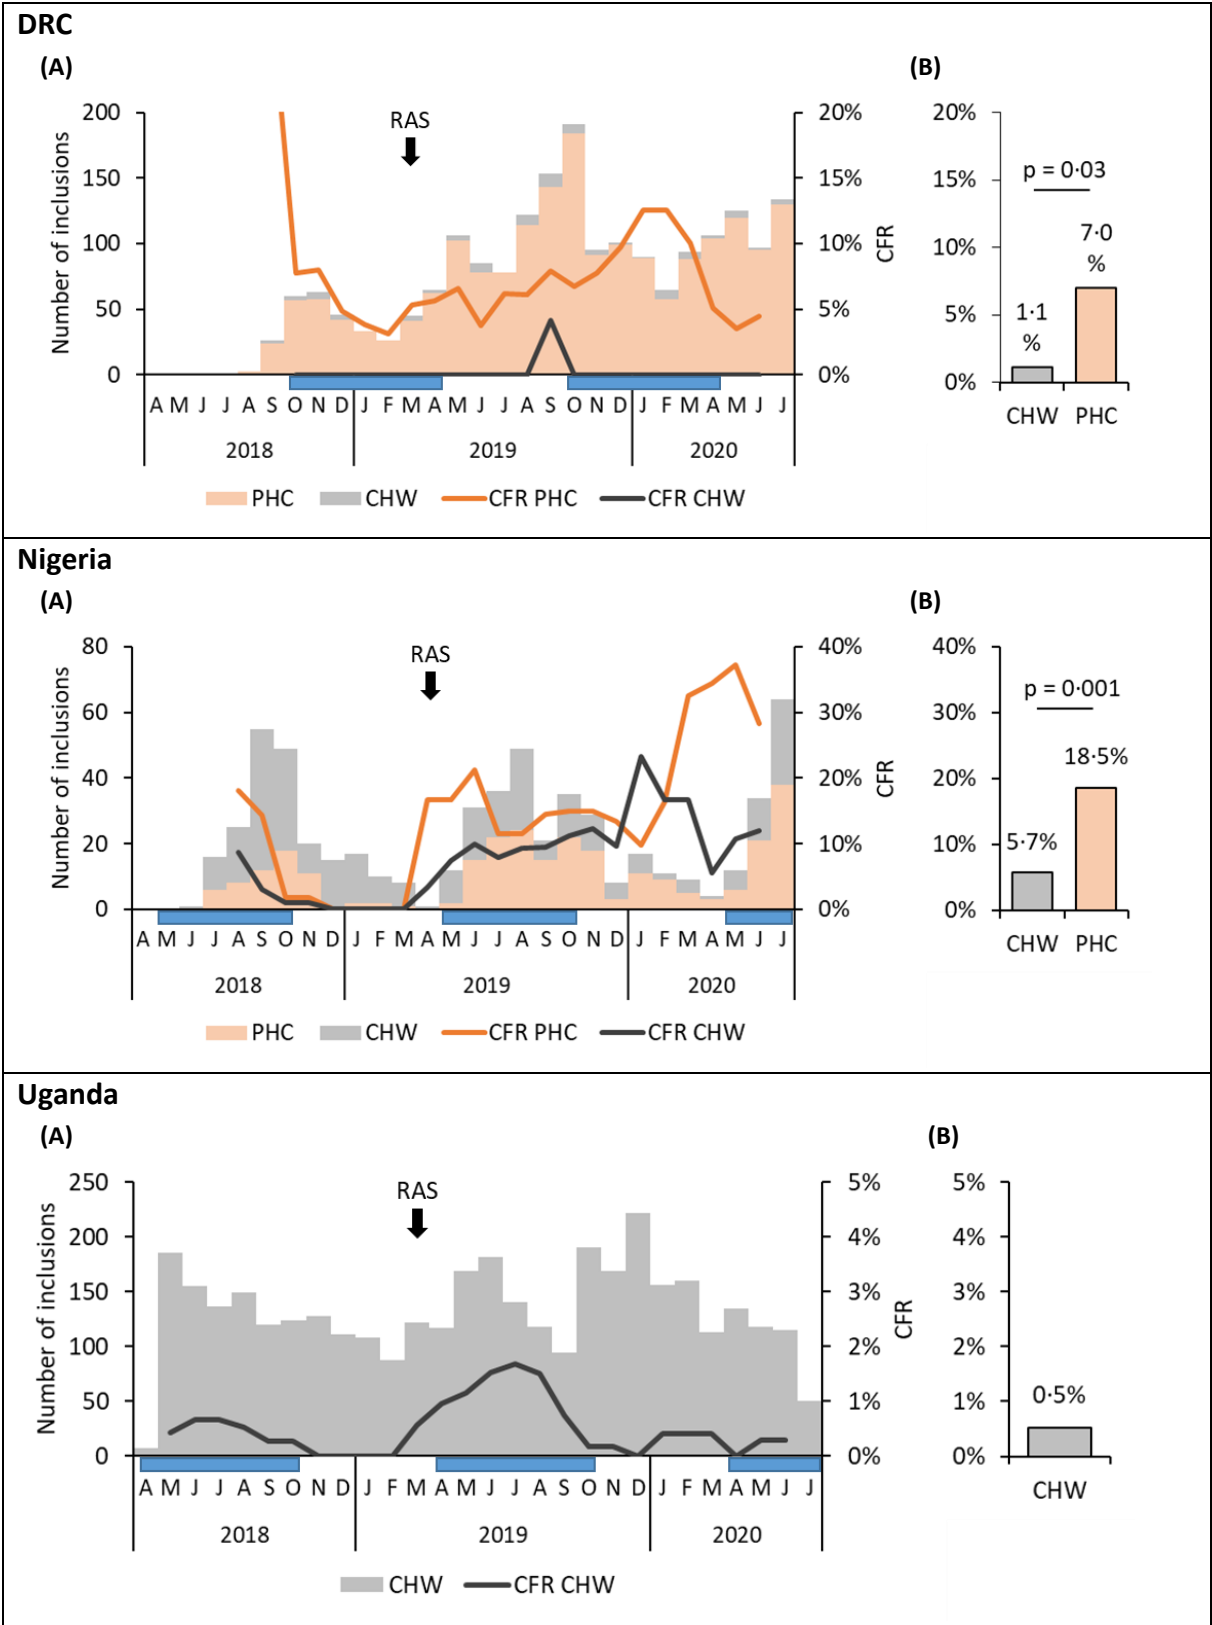

CHW = community health worker, PHC = primary health centre. Horizontal blue bars denote the rainy season.
